# Supplementary material for: Unraveling the role of molecular profiling in predicting treatment response in stage III colorectal cancer patients: Insights from the IDEA International Study
Source: Preprints.org preprint supplement (doi:10.20944/preprints202308.1369.v1), 2023-08-18
Supplement: Supplementary file 3 [file supplementary]

## Sheet: Φύλλο1
Patient No	sex	location	Right_Left	stage_on_diagnosisC	ps	DOB	age	date_diagnosis	surgery	Date_surgery	adjuvant	date_randomization	date_adj_start	date_adj_end	adj_regime	Assignment_3vs6	No_of_cycles	End_Treatment_Reason	Examined_nodes	Positive_nodes	obstruction	perforation	adj_relapse	adj_relapse_date	date_death_or_lastFUP	DFS	OS	grade	T	N	MSI	TaqI	ApaI	FokI	BsmI	TLR2	TLR4_D299G	TLR4_T399I	TLR9_T1237C	TLR9_T1486C	AKT1	AKT2	AKT3	APC	APC2	APPL1	ARAF	AXIN1	AXIN2
1	male	sigmoid	left	IIIA	0	20-Dec-1963	46	23-Mar-10	yes	08-Feb-2010	yes	05-Apr-10	12-Apr-10	13-Jul-10	Folfox	3months	6	chemo completion	52	52	no	no	No		03-Dec-18	105.0	105.0	2	3	1		Wt	Wt	Hetero	Wt	Hetero	Hetero	Hetero	Hetero	Hetero	Wt	Wt	Wt	Mutant	Wt	Wt	Wt	Wt	Wt
2	female	sigmoid	left	IIIB	0	01-Jul-1972	37	19-Jan-10	yes	30-Dec-2009	yes	28-Jan-10	02-Feb-10	13-Apr-10	Folfox	3months	6	chemo completion	29	29	no	yes	No		02-Jul-19	114.0	114.0	2	3	1		Wt	Hetero	Homo	Homo	Hetero	Homo	Homo	Homo	Homo	Wt	Wt	Wt	Mutant	Wt	Mutant	Wt	Mutant	Wt
3	female	descending	left	IIIC	1	22-Feb-1955	54	10-Nov-09	yes	15-Oct-2009	yes	01-Dec-09	03-Dec-09	18-Jan-10	Capox	3months	3	toxicity	37	37	no	no	No		18-May-17	91.0	91.0	2	3	2		Hetero	Wt	Hetero	Hetero	Homo	Homo	Homo	Hetero	Hetero
4	female	sigmoid	left	IIIB	1	08-Jul-1939	70	13-Oct-09	yes	10-Dec-2009	yes	26-Jan-10	03-Feb-10	07-Apr-10	Capox	6months	8	chemo completion	16	16	no	no	No		03-Jul-20	126.0	126.0	2	3	1											Wt	Wt	Wt	Wt	Mutant	Mutant	Wt	Wt	Wt
5	female	transverse	left	IIIB	0	10-Jul-1951	58	02-Nov-09	yes	16-Nov-2009	yes	15-Dec-09	18-Dec-09	05-Mar-10	Folfox	3months	6	chemo completion	51	51	no	no	No		26-Mar-19	112.0	112.0	2	3	1	MSI-Stable	Hetero	Hetero	Wt	Hetero	Homo	Homo	Homo	Homo	Homo	Wt	Wt	Wt	Mutant	Mutant	Mutant	Wt	Mutant	Wt
6	male	sigmoid	left	IIIA	0	11-Jan-1961	57	09-Mar-18	yes	08-Apr-2010	yes	21-Apr-10	10-May-10	10-Aug-10	Folfox	3months	6	chemo completion	42	42	no	no	No		07-Jul-20	122.0	122.0	2	3	2	MSI-Stable										Mutant	Wt	Wt	Mutant	Wt	Wt	Wt	Wt	Wt
7	female	sigmoid	left	IIIA	0	01-Jul-1948	61	01-Dec-09	yes	01-Nov-2009	yes	15-Dec-09	21-Dec-09	22-Feb-10	Capox	3months	3	toxicity	10	10	no	no	No		14-Oct-13	47.0	47.0	2	2	1	MSI-Stable	Hetero	Wt	Wt	Homo	Homo	Hetero	Hetero	Hetero	Hetero	Wt	Wt	Wt	Mutant	Wt	Wt	Wt	Wt	Wt
8	female	sigmoid	left	IIIC	0	10-Sep-1940	69	10-Feb-10	yes	09-Mar-2010	yes	21-Apr-10	21-Apr-10	30-Jun-10	Folfox	3months	6	chemo completion	17	17	no	no	Yes	03-Nov-11	07-Apr-17	19.0	84.0	2	3	2		Hetero	Wt	Hetero	Hetero	Homo	Homo	Homo	Hetero	Hetero	Wt	Wt	Wt	Mutant	Mutant	Wt	Wt	Wt	Mutant
9	female	transverse	left	IIIB	0	27-Nov-1969	40	08-Mar-10	yes	03-Mar-2010	yes	08-Apr-10	08-Apr-10	10-Jun-10	Capox	3months	4	chemo completion	42	42	no	no	No		08-Apr-13	37.0	37.0	2	3	1		Wt	Hetero	Hetero	Wt	Homo	Homo	Homo	Homo	Homo	Wt	Wt	Wt	Mutant	Wt	Mutant	Wt	Wt	Wt
10	female	cecum	right	IIIB	0	17-Jun-1936	73	24-Nov-09	yes	16-Nov-2009	yes	15-Dec-09	04-Jan-10	17-Mar-10	Folfox	3months	6	chemo completion	46	46	no	no	No		21-Oct-19	119.0	119.0	2	3	1											Wt	Wt	Wt	Mutant	Wt	Wt	Wt	Wt	Wt
11	female	sigmoid	left	IIIB	0	02-Oct-1940	69	03-Nov-09	yes	30-Jan-2010	yes	08-Mar-10	08-Mar-10	08-Mar-10	Capox	3months	1	toxicity	27	27	no	yes	No		03-Dec-20	130.0	130.0	2	3	1		Wt	Wt	Wt	Wt	Homo	Hetero	Hetero	Hetero	Hetero	Wt	Wt	Wt	Wt	Wt	Wt	Wt	Wt	Wt
12	female	sigmoid	left	IIIC	0	01-Jul-1951	58	27-Oct-09	yes	13-Nov-2009	yes	14-Dec-09	23-Dec-09	24-Feb-10	Capox	3months	4	chemo completion	13	13	no	no	No		20-Nov-18	108.0	108.0	2	3	2		Wt	Homo	Wt	Wt	Hetero	Hetero	Hetero	Homo	Homo	Wt	Wt	Wt	Mutant	Wt	Wt	Wt	Wt	Wt
13	male	ascending	right	IIIB	0	17-Jul-1945	64	13-May-10	yes	02-Jun-2010	yes	07-Jul-10	14-Jul-10	08-Dec-10	Capox	6months	8	chemo completion	13	13	no	yes	No		18-Nov-20	125.0	125.0	2	3	1		Wt	Wt	Wt	Wt	Hetero	Hetero	Hetero	Homo	Homo	Wt	Wt	Wt	Mutant	Wt	Wt	Wt	Wt	Wt
14	female	sigmoid	left	IIIB	0	21-Sep-1934	75	10-May-10	yes	20-May-2010	yes	17-Jun-10	24-Jun-10	01-Sep-10	Folfox	3months	6	chemo completion	39	39	no	no	Yes	02-Dec-10	15-Sep-20	6.0	123.0	2	3	1	MSI-Stable	Hetero	Hetero	Wt	Hetero	Homo	Hetero	Hetero	Hetero	Hetero	Wt	Wt	Wt	Mutant	Wt	Wt	Wt	Wt	Wt
15	male	sigmoid	left	IIB	0	01-Jul-1954	57	14-Nov-11	yes	29-Jul-2010	yes	06-Sep-10	13-Sep-10	12-Dec-10	Folfox	3months	6	chemo completion	18	18	no	no	No		07-Dec-18	100.0	100.0	2	4	1		Wt	Wt	Wt	Hetero	Hetero	Hetero	Hetero	Homo	Homo
16	male	sigmoid	left	IIIB	1	30-Oct-1940	69	23-Jun-10	yes	03-Jul-2010	yes	27-Sep-10	27-Sep-10	06-Dec-10	Folfox	3months	6	chemo completion	36	36	no	yes	Yes	14-Nov-12	31-Mar-13	28.0	32.0	2	3	1
17	male	sigmoid	left	IIIB	1	13-Mar-1945	65	21-Sep-10	yes	28-Sep-2010	yes	16-Nov-10	16-Nov-10	19-Apr-11	Folfox	6months	12	chemo completion	19	19	no	no	No		30-Jan-20	112.0	112.0	2	3	1		Hetero	Wt	Wt	Hetero	Hetero	Hetero	Hetero	Hetero	Hetero	Wt	Wt	Wt	Mutant	Wt	Wt	Wt	Wt	Wt
18	male	ascending	right	IIIC	0	09-Jul-1955	55	02-Mar-11	yes	28-Feb-2011	yes	06-Apr-11	26-Apr-11	20-Sep-11	Capox	6months	8	chemo completion	35	35	no	no	No		21-Dec-17	81.0	81.0	2	4	1											Wt	Wt	Wt	Wt	Wt	Wt	Wt	Wt	Wt
19	male	ascending	right	IIIB	1	18-Oct-1954	56	15-Apr-11	yes	05-May-2011	yes	01-Jun-11	15-Jun-11	17-Aug-11	Capox	3months	4	chemo completion	21	21	no	no	No		18-Dec-14	43.0	43.0	2	3	1											Mutant	Wt	Wt	Mutant	Wt	Mutant	Wt	Wt	Mutant
20	female	sigmoid	left	IIIB	0	06-Sep-1953	55	27-Mar-09	yes	15-Apr-2011	yes	21-Jun-11	28-Jun-11	01-Sep-11	Capox	3months	4	chemo completion	12	12	no	no	No		12-Aug-13	27.0	27.0	2	3	1		Wt	Wt	Wt	Hetero	Homo	Homo	Homo	Hetero	Hetero	Wt	Wt	Wt	Mutant	Wt	Wt	Wt	Wt	Mutant
21	female	cecum	right	IIIC	0	01-Sep-1952	64	28-Apr-17	yes	10-Feb-2012	yes	12-Mar-12	12-Mar-12	21-May-12	Folfox	3months	6	chemo completion	41	41	no	no	Yes	02-May-17	03-Jan-19	62.0	82.0	2	3	1	MSI-Stable										Wt	Wt	Wt	Wt	Mutant	Wt	Wt	Wt	Wt
22	male	sigmoid	left	IIB	0	01-Jul-1942	64	13-Nov-06	yes	14-Mar-2011	yes	20-Apr-11	27-Apr-11	22-Sep-11	Capox	6months	8	chemo completion	46	46	no	no	No		30-Oct-08	91.0	91.0	2	3	1	MSI-Stable	Hetero	Wt	Hetero	Homo	Hetero	Homo	Homo	Homo	Homo	Wt	Wt	Wt	Mutant	Wt	Wt	Wt	Wt	Mutant
23	male	sigmoid	left	IB	0	25-Sep-1940	78	03-Jun-19	yes	31-Aug-2012	yes	04-Oct-12	18-Oct-12	27-Dec-12	Folfox	3months	6	chemo completion	13	13	no	no	No		03-Dec-19	87.0	87.0	2	3	1											Wt	Wt	Wt	Mutant	Wt	Wt	Wt	Wt	Wt
24	female	sigmoid	left	IIA	1	28-Feb-1946	73	12-Feb-20	yes	28-Jul-2011	yes	22-Aug-11	29-Aug-11	15-Nov-11	Folfox	3months	6	chemo completion	34	34	no	no	No		01-Dec-20	112.0	112.0	2	4	1	MSI-Stable										Wt	Wt	Wt	Mutant	Mutant	Wt	Wt	Wt	Mutant
25	male	sigmoid	left	IIIC	0	06-Jun-1957	54	05-Jul-11	yes	12-Jul-2011	yes	22-Aug-11	24-Aug-11	01-Nov-11	Capox	3months	4	chemo completion	17	17	no	no	No		15-Aug-17	73.0	73.0	2	3	2		Wt	Hetero	Hetero	Hetero	Hetero	Hetero	Hetero	Homo	Homo	Wt	Wt	Wt	Mutant	Wt	Wt	Wt	Wt	Mutant
26	female	sigmoid	left	IIIC	1	15-Apr-1960	51	06-Jul-11	yes	04-Jul-2011	yes	12-Aug-11	12-Aug-11	24-Oct-11	Capox	3months	4	chemo completion	13	13	no	no	Yes	04-Oct-12	03-Apr-15	15.0	38.0	2	2	1	MSI-Stable	Wt	Homo	Homo	Homo	Hetero	Homo	Homo	Hetero	Hetero	Wt	Wt	Wt	Wt	Wt	Wt	Wt	Wt	Wt
27	male	descending	left	IIIC	1	21-Jun-1991	20	07-Jul-11	yes	01-Jul-2011	yes	19-Aug-11	19-Aug-11	04-Sep-11	Folfox	3months	2	toxicity	25	25	no	no	Yes	06-Nov-11	31-Dec-11	4.0	5.0	2	4	2	MSI-Stable										Wt	Wt	Wt	Mutant	Mutant	Wt	Mutant	Mutant	Wt
28	male	sigmoid	left	IIIB	0	03-Jul-1946	64	21-Jun-11	yes	07-Jul-2011	yes	29-Aug-11	05-Sep-11	15-Nov-11	Capox	3months	4	chemo completion	13	13	no	no	No		31-Jan-20	102.0	102.0	2	3	1		Homo	Wt	Hetero	Homo	Homo	Homo	Homo	Homo	Homo	Wt	Wt	Wt	Mutant	Wt	Wt	Wt	Wt	Wt
29	male	sigmoid	left	IIIB	0	09-Nov-1937	76	18-Dec-13	yes	29-Jul-2011	yes	15-Sep-11	15-Sep-11	24-Nov-11	Capox	6months	4	chemo completion	30	30	no	no	No		05-Mar-20	103.0	103.0	2	4	1											Wt	Wt	Wt	Mutant	Wt	Wt	Wt	Wt	Wt
30	male	ascending	right	IIB	0	02-Jul-1962	52	12-Dec-14	yes	30-Sep-2011	yes	10-Nov-11	11-Nov-11	02-Jan-12	Folfox	3months	6	chemo completion	12	12	no	no	Yes	23-Mar-15	08-Feb-16	41.0	52.0	2	3	1											Wt	Wt	Wt	Mutant	Mutant	Wt	Wt	Wt	Mutant
31	male	descending	left	IIIB	1	03-Dec-1955	55	11-Aug-11	yes	09-Sep-2011	yes	01-Nov-11	02-Nov-11	04-Jan-12	Capox	3months	4	chemo completion	30	30	no	yes	Yes	08-Dec-14	01-Nov-15	69.0	69.0	2	4	1		Hetero	Hetero	Wt	Hetero	Hetero	Hetero	Hetero	Homo	Homo	Mutant	Wt	Wt	Mutant	Wt	Wt	Wt	Wt	Wt
32	male	transverse	left	IIA	0	10-Jun-1948	61	27-May-10	yes	03-Oct-2011	yes	14-Nov-11	24-Nov-11	26-Apr-12	Capox	6months	8	chemo completion	27	27	no	yes	No		02-Sep-13	22.0	22.0	2	3	1		Hetero	Wt	Wt	Hetero	Homo	Homo	Homo	Hetero	Hetero	Wt	Wt	Wt	Mutant	Wt	Wt	Wt	Wt	Wt
33	male	sigmoid	left	IIIA	0	13-Jul-1937	80	07-Jun-18	yes	14-Jul-2009	yes	01-Sep-09	03-Sep-09	05-Nov-09	Capox	3months	4	chemo completion	15	15	no	no	No		12-Feb-19	114.0	114.0	2	3	1	MSI-Stable										Wt	Wt	Wt	Mutant	Wt	Wt	Wt	Wt	Wt
34	male	sigmoid	left	IIC	0	01-Jul-1936	73	29-Aug-09	yes	26-Aug-2009	yes	23-Sep-09	29-Sep-09	23-Feb-10	Capox	6months	8	chemo completion	13	13	no	no	No		15-Aug-16	83.0	83.0	2	3	1	MSI-Stable										Wt	Wt	Wt	Mutant	Mutant	Wt	Wt	Wt	Wt
35	male	transverse	left	IIIB	1	01-Jan-1949	70	17-May-19	yes	02-Sep-2009	yes	25-Oct-09	27-Oct-09	29-Dec-09	Capox	3months	4	chemo completion	27	27	no	no	Yes	07-Oct-20	04-Nov-20	133.0	134.0	2	3	1	MSI-Stable										Wt	Wt	Mutant	Mutant	Mutant	Wt	Wt	Wt	Wt
36	male	ascending	right	IIIB	0	01-Jul-1940	71	15-Sep-11	yes	15-Oct-2011	yes	09-Dec-11	16-Dec-11	20-Feb-12	Capox	3months	6	chemo completion			no	no	No		04-Apr-12	5.0	5.0	2	3	1		Wt	Hetero	Hetero	Hetero	Homo	Hetero	Hetero	Homo	Homo	Wt	Wt	Wt	Mutant	Wt	Wt	Wt	Wt	Wt
37	male	sigmoid	left	IIIC	1	21-Feb-1940	70	21-Oct-10	yes	29-Jan-2010	yes	04-Mar-10	22-Mar-10	01-Jun-10	Capox	3months	4	chemo completion	25	25	no	no	Yes	27-Nov-10	14-Oct-19	9.0	116.0	2	3	1	MSI-Stable
38	female	ascending	right	IIIC	0	15-May-1977	36	02-Oct-13	yes	09-Sep-2010	yes	21-Oct-10	25-Oct-10	02-May-11	Capox	6months	8	chemo completion	12	12	no	no	No		15-May-14	44.0	44.0	2	3	2	MSI-Stable	Wt	Wt	Wt	Wt	Homo	Homo	Homo	Homo	Homo	Wt	Wt	Wt	Mutant	Mutant	Wt	Wt	Wt	Mutant
39	male	cecum	right	IIIB	0	19-Mar-1948	59	26-Jul-07	yes	22-Oct-2010	yes	12-Nov-10	25-Nov-10	20-Jan-11	Capox	3months	4	chemo completion	25	25	no	no	No		22-Jun-17	80.0	80.0	2	2	2		Homo	Hetero	Homo	Homo	Homo	Hetero	Hetero	Homo	Homo	Wt	Wt	Wt	Mutant	Wt	Wt	Wt	Wt	Wt
40	male	cecum	right	IIB	0	01-Jul-1966	45	07-Sep-11	yes	07-Oct-2010	yes	11-Nov-10	15-Nov-10	17-May-11	Capox	6months	8	chemo completion	20	20	no	no	No		25-May-17	79.0	79.0	2	3	1	MSI-High	Hetero	Wt	Hetero	Wt	Homo	Hetero	Hetero	Hetero	Hetero	Wt	Wt	Wt	Mutant	Wt	Wt	Wt	Wt	Wt
41	male	sigmoid	left	IIIB	0	28-Apr-1973	36	08-Dec-09	yes	09-Nov-2010	yes	03-Dec-10	13-Dec-10	07-Feb-11	Capox	3months	4	chemo completion	15	15	no	no	Yes	02-May-11	21-Oct-20	5.0	119.0	2	3	2	MSI-Stable										Wt	Wt	Wt	Mutant	Wt	Wt	Wt	Mutant	Mutant
42	male	cecum	right	IIIB	0	07-Jun-1947	72	19-Jun-19	yes	16-Dec-2010	yes	17-Jan-11	26-Jan-11	21-Jun-11	Capox	6months	8	chemo completion	11	11	no	no	No		16-Jun-20	114.0	114.0	2	4	2	MSI-Stable										Wt	Wt	Wt	Mutant	Wt	Mutant	Wt	Wt	Mutant
43	female	sigmoid	left	IIA	0	18-Oct-1943	64	20-Feb-08	yes	20-May-2011	yes	22-Jun-11	27-Jun-11	21-Nov-11	Capox	6months	8	chemo completion	19	19	no	no	No		02-Sep-20	111.0	111.0	2	4	1											Wt	Wt	Wt	Mutant	Wt	Mutant	Wt	Wt	Wt
44	male	sigmoid	left	IIIA	0	17-Jan-1943	66	09-Jun-09	yes	30-Jun-2011	yes	02-Aug-11	04-Aug-11	29-Dec-11	Capox	6months	8	chemo completion	12	12	no	no	No		16-Jul-20	108.0	108.0	2	3	1											Wt	Wt	Wt	Mutant	Wt	Wt	Wt	Wt	Wt
45	male	sigmoid	left	IIIC	0	10-Nov-1951	66	03-Apr-18	yes	29-Jul-2011	yes	01-Sep-11	27-Sep-11	21-Feb-12	Capox	6months	8	chemo completion	16	16	no	yes	Yes	16-Apr-19	07-Dec-20	92.0	112.0	2	3	1	MSI-Stable										Wt	Wt	Wt	Mutant	Wt	Wt	Wt	Wt	Mutant
46	female	sigmoid	left	IIIB	0	07-Dec-1950	60	06-Oct-11	yes	04-Dec-2011	yes	09-Jan-12	09-Jan-12	20-Jun-12	Folfox	6months	12	chemo completion	44	44	no	no	No		03-Sep-20	104.0	104.0	2	3	1											Wt	Wt	Wt	Mutant	Wt	Wt	Wt	Wt	Wt
47	male	sigmoid	left	IIIA	0	06-Jun-1953	58	02-Jan-12	yes	13-Dec-2011	yes	20-Jan-12	25-Jan-12	05-Apr-12	Capox	3months	4	chemo completion	12	12	no	no	No		16-Dec-19	96.0	96.0	2	3	1											Wt	Wt	Wt	Mutant	Wt	Wt	Wt	Wt	Wt
48	female	cecum	right	IIA	1	01-Jan-1951	53	22-Nov-04	yes	14-Dec-2009	yes	04-Feb-10	08-Feb-10	10-May-10	Capox	3months	4	chemo completion	15	15	no	no	No		15-May-13	41.0	41.0	2	3	1
49	male	sigmoid	left	IIIB	1	02-Feb-1941	67	21-May-08	yes	04-Mar-2010	yes	08-Apr-10	08-Apr-10	15-Jun-10	Folfox	3months	6	chemo completion	13	13	no	no	No		18-Sep-19	114.0	114.0	2	2	1		Wt	Wt	Wt	Wt	Hetero	Hetero	Hetero	Hetero	Hetero	Wt	Wt	Wt	Mutant	Wt	Wt	Wt	Wt	Mutant
50	female	ascending	right	IIIC	1	22-May-1949	60	30-Nov-09	yes	12-Mar-2010	yes	23-Apr-10	30-Apr-10	02-Jul-10	Capox	3months	4	chemo completion	21	21	no	no	No		11-Sep-18	101.0	101.0	2	3	1	MSI-Stable	Homo	Homo	Homo	Homo	Homo	Homo	Homo	Homo	Homo	Wt	Wt	Wt	Mutant	Wt	Wt	Wt	Wt	Wt
51	male	ascending	left	IB	0	05-Sep-1945	74	25-Sep-19	yes	19-May-2010	yes	17-Jun-10	21-Jun-10	30-Oct-10	Folfox	3months	6	chemo completion	15	15	no	no	No		24-Mar-20	118.0	118.0	2	4	1	MSI-Stable										Wt	Wt	Wt	Mutant	Wt	Wt	Wt	Wt	Mutant
52	male	sigmoid	left	IIIB	0	14-May-1942	69	20-Dec-11	yes	25-Feb-2012	yes	08-Mar-12	26-Mar-12	31-May-12	Folfox	3months	6	chemo completion	28	28	no	no	No		29-Jul-20	101.0	101.0	2	3	1											Wt	Wt	Wt	Mutant	Wt	Wt	Wt	Wt	Wt
53	male	ascending	right	IIA	0	03-May-1959	60	20-Nov-19	yes	22-Jul-2010	yes	25-Aug-10	25-Aug-10	20-Jan-11	Capox	6months	8	chemo completion	33	33	no	no	No		04-Feb-20	114.0	114.0	2	2	2	MSI-Stable										Wt	Wt	Wt	Mutant	Wt	Wt	Wt	Wt	Mutant
54	male	cecum	right	IIIA	0	12-Apr-1933	72	09-Jun-05	yes	18-Sep-2010	yes	25-Oct-10	25-Oct-10	07-Feb-11	Capox	3months	4	chemo completion	25	25	no	no	No		07-Feb-17	76.0	76.0	2	3	1	MSI-Stable										Wt	Wt	Wt	Mutant	Wt	Wt	Wt	Wt	Wt
55	female	transverse	left	IIIB	0	01-Jul-1955	53	10-Feb-09	yes	15-Oct-2010	yes	16-Nov-10	16-Nov-10	18-May-11	Folfox	6months	11	toxicity	20	20	no	no	No		08-Oct-14	47.0	47.0	2	3	1		Wt	Wt	Hetero	Homo	Homo	Hetero	Hetero	Hetero	Hetero
56	male	cecum	right	IIA	0	10-Jun-1945	68	18-Oct-13	yes	29-Nov-2010	yes	21-Dec-10	28-Dec-10	03-Mar-11	Capox	3months	4	chemo completion	20	20	no	no	No		06-Dec-17	84.0	84.0	2	3	2	MSI-Stable										Wt	Wt	Wt	Mutant	Mutant	Wt	Wt	Wt	Mutant
57	female	descending	left	IIA	1	01-Jul-1944	63	03-Aug-07	yes	03-Dec-2010	yes	22-Dec-10	05-Jan-11	01-Jun-11	Capox	6months	8	chemo completion	34	34	no	no	No		22-May-18	89.0	89.0	2	3	1	MSI-Stable	Hetero	Wt	Wt	Hetero	Homo	Homo	Homo	Hetero	Hetero	Wt	Wt	Wt	Mutant	Wt	Wt	Wt	Wt	Mutant
58	male	sigmoid	left	IIIA	0	08-May-1958	59	02-May-18	yes	07-Dec-2010	yes	18-Jan-11	18-Jan-11	30-Jun-11	Capox	6months	8	chemo completion	21	21	no	no	Yes	21-May-20	08-Dec-20	113.0	120.0	2	3	1	MSI-Stable										Wt	Wt	Wt	Wt	Wt	Wt	Wt	Wt	Wt
59	male	sigmoid	left	IIA	0	28-Jan-1942	71	03-Apr-13	yes	15-Mar-2011	yes	14-Apr-11	21-Apr-11	23-Jun-11	Capox	3months	4	chemo completion	48	48	no	no	No		18-Jul-18	88.0	88.0	2	3	1	MSI-High										Wt	Mutant	Wt	Mutant	Mutant	Wt	Wt	Wt	Wt
60	male	ascending	right	IIB	1	01-Jul-1966	44	27-Mar-11	yes	27-Apr-2011	yes	30-May-11	30-May-11	03-Nov-11	Capox	6months	8	chemo completion	27	27	no	no	No					2	3	1											Wt	Wt	Wt	Wt	Wt	Mutant	Wt	Wt	Wt
61	male	ascending	right	IIIC	1	15-Jul-1946	68	10-Dec-14	yes	17-May-2011	yes	03-Jun-11	14-Jun-11	01-Nov-11	Capox	6months	8	chemo completion	17	17	no	no	Yes	20-Oct-16	18-Nov-17	65.0	78.0	2	2	2	MSI-Stable										Wt	Wt	Wt	Mutant	Mutant	Mutant	Wt	Wt	Wt
62	male	sigmoid	left	IIB	1	01-Jul-1945	62	01-Oct-07	yes	12-May-2011	yes	23-May-11	13-Jun-11	17-Jan-12	Folfox	6months	12	chemo completion	32	32	no	no	No		24-Aug-08	87.0	87.0	2	3	2		Wt	Hetero	Wt	Hetero	Hetero	Homo	Homo	Hetero	Hetero	Wt	Wt	Wt	Wt	Wt	Wt	Wt	Wt	Wt
63	female	sigmoid	left	IIIC	0	29-Jan-1951	64	02-Mar-15	yes	15-Apr-2011	yes	23-May-11	06-Jun-11	11-Nov-11	Capox	6months	8	chemo completion	17	17	no	no	Yes	29-May-17	16-Sep-20	73.0	113.0	2	3	1	MSI-High										Wt	Wt	Wt	Wt	Wt	Wt	Wt	Wt	Wt
64	male	transverse	left	IIIC	0	18-May-1953	54	05-Jan-08	yes	20-May-2011	yes	23-Jun-11	23-Jun-11	23-Nov-11	Capox	6months	8	chemo completion	16	16	no	no	No		20-Nov-19	102.0	102.0	2	3	2		Wt	Hetero	Wt	Wt	Hetero	Homo	Homo	Hetero	Hetero
65	male	sigmoid	left	IIIB	0	25-Oct-1989	18	29-Apr-08	yes	23-May-2011	yes	20-Jun-11	24-Jun-11	22-Nov-11	Capox	6months	8	chemo completion	56	56	no	no	No		29-Jun-17	73.0	73.0	2	3	1	MSI-High	Hetero	Hetero	Wt	Hetero	Homo	Hetero	Hetero	Hetero	Hetero	Wt	Wt	Wt	Mutant	Wt	Wt	Wt	Mutant	Wt
66	female	sigmoid	left	IIIC	1	12-Jan-1950	66	15-Jul-16	yes	10-May-2011	yes	07-Jun-11	27-Jun-11	28-Dec-11	Folfox	6months	12	chemo completion	16	16	no	no	Yes	03-Sep-16	21-Sep-20	63.0	112.0	2	4	2	MSI-Stable										Wt	Wt	Wt	Mutant	Wt	Wt	Wt	Mutant	Wt
67	male	cecum	right	IIIC	1	10-Apr-1928	81	13-Oct-09	yes	29-Jun-2011	yes	25-Jul-11	25-Jul-11	24-Jan-12	Capox	6months	8	chemo completion	27	27	yes	no	No		28-Jan-13	18.0	18.0	2	3	1											Wt	Wt	Wt	Mutant	Wt	Wt	Wt	Wt	Wt
68	male	ascending	right	IIIB	1	15-Mar-1946	73	03-Oct-19	yes	23-Jun-2011	yes	23-Jul-11	28-Jul-11	04-Jan-12	Capox	6months	8	chemo completion	13	13	no	no	No		08-Sep-20	110.0	110.0	2	2	2	MSI-Stable
69	male	sigmoid	left	IIIB	0	13-Jul-1963	54	07-Nov-17	yes	20-Jul-2011	yes	22-Aug-11	29-Aug-11	23-Jan-12	Capox	6months	8	chemo completion	16	16	no	no	No		07-Oct-20	110.0	110.0	2	2	2	MSI-Stable										Wt	Wt	Wt	Mutant	Wt	Wt	Wt	Wt	Wt
70	female	ascending	right	IIA	0	08-Feb-1947	66	30-Oct-13	yes	06-Aug-2011	yes	06-Sep-11	06-Sep-11	15-Nov-11	Capox	3months	4	chemo completion	48	48	no	no	Yes	14-Nov-17	05-Feb-19	75.0	89.0	2	3	1	MSI-Stable										Wt	Wt	Wt	Mutant	Wt	Wt	Wt	Wt	Mutant
71	female	ascending	right	IIIA	1	18-Jan-1971	47	31-Jul-18	yes	29-May-2010	yes	05-Jul-10	12-Jul-10	09-Oct-10	Folfox	3months	6	chemo completion	45	45	no	no	No		20-Nov-19	113.0	113.0	2	4	1	MSI-Stable										Wt	Wt	Wt	Wt	Wt	Wt	Wt	Wt	Wt
72	male	ascending	right	IIIC	0	30-May-1972	44	03-Nov-16	yes	08-Aug-2011	yes	16-Sep-11	30-Sep-11	16-Feb-12	Folfox	3months	6	chemo completion	17	17	no	no	Yes	20-Dec-16	15-May-19	64.0	93.0	2	4	1	MSI-Stable										Wt	Wt	Wt	Mutant	Wt	Wt	Wt	Wt	Wt
73	female	descending	left	IIIC	0	16-Nov-1972	45	14-Jun-18	yes	20-Sep-2011	yes	20-Oct-11	20-Oct-11	02-Apr-12	Folfox	6months	10	toxicity	13	13	no	no	Yes	27-Jun-18	05-Feb-19	81.0	88.0	2	3	1	MSI-Stable										Wt	Wt	Wt	Mutant	Mutant	Wt	Wt	Wt	Wt
74	female	cecum	right	IIIC	1	17-Nov-1938	74	22-Mar-13	yes	06-Sep-2011	yes	10-Oct-11	24-Oct-11	10-Jan-12	Capox	3months	4	chemo completion	40	40	no	no	Yes	15-Jun-13	10-Jan-15	21.0	40.0	2	4	2		Wt	Hetero	Hetero	Hetero	Homo	Homo	Homo	Hetero	Hetero	Wt	Wt	Wt	Mutant	Wt	Wt	Mutant	Wt	Wt
75	male	cecum	right	IIIB	0	01-Jul-1952	54	27-Dec-06	yes	23-Sep-2011	yes	02-Nov-11	16-Nov-11	11-Apr-12	Capox	6months	8	chemo completion	44	44	no	no	No		21-Feb-20	100.0	100.0	2	3	1		Hetero	Homo	Homo	Homo	Hetero	Homo	Homo	Hetero	Hetero	Wt	Wt	Wt	Mutant	Wt	Wt	Wt	Wt	Wt
76	male	descending	left	IIIB	0	13-Aug-1977	37	03-Nov-14	yes	10-Oct-2011	yes	14-Nov-11	21-Nov-11	07-Feb-12	Capox	3months	4	chemo completion	15	15	no	no	No		08-Sep-17	70.0	70.0	2	3	1	MSI-Stable										Wt	Wt	Wt	Mutant	Mutant	Wt	Wt	Wt	Mutant
77	male	sigmoid	left	IIIC	0	19-Oct-1963	48	28-Feb-12	yes	21-Feb-2012	yes	19-Mar-12	26-Mar-12	30-Aug-12	Folfox	6months	12	chemo completion	31	31	no	no	No		25-Jun-20	100.0	100.0	2	3	2											Wt	Wt	Wt	Mutant	Wt	Wt	Wt	Wt	Wt
78	female	descending	left	IIIC	1	20-Sep-1968	43	18-Apr-12	yes	30-Apr-2012	yes	18-Jun-12	18-Jun-12	10-Sep-12	Folfox	3months	6	chemo completion	30	30	no	no	No		22-Jan-20	92.0	92.0	2	4	1	MSI-Stable										Wt	Wt	Wt	Mutant	Wt	Wt	Wt	Wt	Wt
79	male	sigmoid	left	IIA	0	16-Sep-1935	73	25-Jun-09	yes	26-Jul-2010	yes	31-Aug-10	13-Sep-10	09-Feb-11	Capox	6months	8	chemo completion	13	13	no	no	Yes	07-Jul-11	09-Dec-17	11.0	88.0	2	2	1											Wt	Wt	Wt	Wt	Wt	Wt	Wt	Wt	Wt
80	male	cecum	right	IIC	1	01-Jul-1943	67	28-Aug-10	yes	28-Sep-2010	yes	01-Nov-10	29-Nov-10	01-Jun-11	Capox	6months	8	chemo completion	18	18	no	yes	No					2	3	1											Wt	Wt	Wt	Mutant	Wt	Wt	Wt	Wt	Wt
81	male	descending	left	IIB	0	14-Feb-1957	63	06-May-20	yes	27-Oct-2011	yes	05-Dec-11	14-Nov-11	20-Feb-12	Capox	3months	4	chemo completion	19	19	no	no	No		06-Aug-20	105.0	105.0	2	3	2	MSI-Stable										Wt	Wt	Wt	Mutant	Wt	Wt	Wt	Wt	Wt
82	female	transverse	left	IIIC	1	20-Jun-1961	48	25-May-10	yes	03-Dec-2011	yes	10-Jan-12	10-Jan-12	02-Jul-12	Capox	6months	8	chemo completion	15	15	no	no	No		01-Oct-12	9.0	9.0	2	3	1		Homo	Hetero	Hetero	Homo	Homo	Homo	Homo	Homo	Homo	Mutant
83	female	ascending	right	IIIB	0	10-Jul-1950	57	01-Nov-07	yes	28-Dec-2011	yes	03-Feb-12	06-Feb-12	09-Apr-12	Capox	3months	4	chemo completion	16	16	no	no	No		05-Dec-19	95.0	95.0	2	3	1											Wt	Wt	Wt	Mutant	Wt	Wt	Wt	Wt	Wt
84	female	sigmoid	left	IIIB	0	19-Jan-1931	74	07-Apr-05	yes	21-Dec-2012	yes	13-Feb-13	18-Feb-13	22-Apr-13	Capox	3months	4	chemo completion	15	15	no	no	No		20-Oct-09	81.0	81.0	2	3	2		Wt	Hetero	Wt	Hetero	Homo	Hetero	Hetero	Hetero	Hetero
85	male	ascending	right	IIIC	1	10-Nov-1940	76	11-Oct-17	yes	15-Mar-2012	yes	23-Apr-12	23-Apr-12	24-Aug-12	Folfox	3months	6	chemo completion	49	49	no	no	Yes	01-Nov-17	19-Oct-20	67.0	103.0	2	3	1	MSI-Stable										Wt	Wt	Wt	Mutant	Wt	Wt	Wt	Wt	Mutant
86	male	sigmoid	left	IIIC	0	24-Aug-1931	75	21-Jun-07	yes	29-Mar-2012	yes	26-Apr-12	26-Apr-12	24-Oct-12	Capox	6months	8	chemo completion	14	14	no	no	No		28-Nov-12	7.0	7.0	2	3	1											Wt	Wt	Wt	Mutant	Mutant	Wt	Wt	Wt	Mutant
87	female	transverse	left	IIA	0	19-Aug-1954	54	12-Dec-08	yes	08-Sep-2011	yes	11-Oct-11	11-Oct-11	14-Feb-12	Folfox	6months	9	toxicity	15	15	no	no	No		07-Jul-11	5.0	5.0	2	3	2		Wt	Wt	Wt	Hetero	Homo	Hetero	Hetero	Hetero	Hetero	Wt	Wt	Wt	Mutant	Wt	Wt	Wt	Wt	Mutant
88	male	sigmoid	left	IIIC	0	01-Jul-1965	50	23-Mar-16	yes	29-Mar-2012	yes	02-May-12	09-May-12	15-Nov-12	Capox	6months	8	chemo completion	13	13	no	no	Yes	10-Apr-16	16-Feb-17	48.0	58.0	2	3	2	MSI-Stable	Wt	Wt	Hetero	Hetero	Homo	Hetero	Hetero	Hetero	Hetero
89	male	sigmoid	left	IIIB	0	27-Aug-1954	57	09-Jul-12	yes	19-Jul-2012	yes	21-Aug-12	28-Aug-12	07-Nov-12	Folfox	3months	6	chemo completion	15	15	no	no	No		18-Apr-19	80.0	80.0	2	3	1											Wt	Wt	Wt	Mutant	Wt	Wt	Wt	Wt	Wt
90	female	sigmoid	left	IIC	0	20-Jul-1962	57	31-Jul-19	yes	02-May-2012	yes	07-Jun-12	11-Jun-12	02-Nov-12	Capox	6months	8	chemo completion	21	21	no	no	Yes	01-Aug-19	23-Oct-20	86.0	101.0	2	3	2	MSI-Stable										Wt	Wt	Wt	Wt	Wt	Wt	Wt	Wt	Mutant
91	female	ascending	right	IIA	1	15-Jan-1937	69	06-Jun-06	yes	23-Jul-2010	yes	01-Sep-10	22-Sep-10	25-Nov-10	Capox	3months	4	chemo completion	27	27	no	no	No		27-Mar-13	32.0	32.0	2	2	1											Wt	Wt	Wt	Mutant	Mutant	Wt	Wt	Wt	Mutant
92	female	ascending	right	IIIB	0	17-May-1960	58	15-Oct-18	yes	18-Apr-2012	yes	22-May-12	24-May-12	29-Oct-12	Folfox	6months	12	chemo completion	27	27	no	no	Yes	02-Oct-19	04-Nov-20	89.0	102.0	2	3	1	MSI-Stable										Wt	Wt	Wt	Mutant	Wt	Wt	Wt	Wt	Wt
93	female	ascending	right	IIIC	1	23-Feb-1936	76	03-Jul-12	yes	12-Aug-2012	yes	25-Sep-12	15-Oct-12	17-Dec-12	Capox	3months	4	chemo completion	50	50	no	no	No		05-Aug-20	95.0	95.0	2	4	1											Wt	Wt	Wt	Mutant	Mutant	Wt	Wt	Wt	Wt
94	male	sigmoid	left	IIA	1	20-Mar-1938	71	07-Oct-09	yes	28-Jun-2012	yes	19-Aug-12	29-Aug-12	06-Feb-13	Capox	6months	8	chemo completion	15	15	no	no	No		31-Oct-17	64.0	64.0	2	3	1	MSI-Stable	Wt	Hetero	Wt	Hetero	Homo	Homo	Homo	Hetero	Hetero	Wt	Wt	Wt	Mutant	Wt	Wt	Wt	Wt	Wt
95	male	cecum	right	IIC	1	18-Jun-1940	77	07-Feb-18	yes	11-Apr-2012	yes	17-May-12	14-May-12	29-Oct-12	Folfox	6months	12	chemo completion	19	19	no	no	Yes	07-Jan-18	07-Aug-18	68.0	75.0	2	3	2	MSI-Stable										Wt	Wt	Wt	Mutant	Mutant	Wt	Wt	Wt	Mutant
96	male	cecum	right	IIA	0	17-Mar-1938	71	03-Jul-09	yes	05-Mar-2012	yes	09-Apr-12	23-Apr-12	29-Jun-12	Capox	3months	4	chemo completion	28	28	no	no	No		09-Sep-20	102.0	102.0	2	3	1											Wt	Wt	Wt	Wt	Wt	Wt	Wt	Wt	Wt
97	male	sigmoid	left	IIIB	0	11-Oct-1955	53	07-Jun-09	yes	22-Apr-2012	yes	17-May-12	24-May-12	27-Aug-12	Capox	3months	4	chemo completion	30	30	no	no	No		30-Nov-20	103.0	103.0	2	3	1	MSI-Stable
98	female	ascending	right	IIA	1	15-Aug-1932	75	23-Aug-07	yes	24-Jul-2012	yes	23-Aug-12	30-Aug-12	10-Oct-12	Folfox	6months	3	toxicity	14	14	no	no	No		21-Oct-15	38.0	38.0	2	3	1											Wt	Wt	Mutant	Mutant	Wt	Wt	Wt	Wt	Wt
99	female	transverse	left	IIIB	0	01-Jul-1947	62	04-Dec-09	yes	11-Jun-2011	yes	09-Jul-11	16-Jul-11	13-Dec-11	Capox	6months	8	chemo completion	54	54	no	no	No		19-Oct-18	88.0	88.0	2	3	1		Hetero	Hetero	Hetero	Hetero	Homo	Homo	Homo	Homo	Homo	Wt	Wt	Wt	Wt	Wt	Wt	Wt	Wt	Wt
100	male	sigmoid	left	IIIB	1	26-Oct-1941	76	25-Apr-18	yes	04-Apr-2011	yes	09-May-11	20-May-11	14-Oct-11	Capox	6months	8	chemo completion	13	13	no	no	Yes	06-Jul-18	17-Oct-19	87.0	102.0	2	3	2	MSI-Stable
101	male	ascending	right	IIIB	0	29-Dec-1964	47	22-May-12	yes	02-Apr-2012	yes	07-May-12	28-May-12	19-Nov-12	Capox	6months	8	chemo completion	67	67	no	no	No		11-Jun-20	98.0	98.0	2	4	1	MSI-High										Wt	Wt	Wt	Wt	Wt	Wt	Wt	Wt	Wt
102	female	cecum	right	IIIB	0	21-Jan-1939	79	29-Jun-18	yes	04-Jul-2012	yes	03-Aug-12	03-Aug-12	15-Oct-12	Capox	3months	4	chemo completion	12	12	no	no	No		03-Dec-19	88.0	88.0	2	2	1											Wt	Wt	Wt	Mutant	Wt	Wt	Wt	Wt	Wt
103	male	transverse	left	IIIB	0	01-Jan-1953	60	19-Aug-13	yes	07-May-2012	yes	11-Jun-12	25-Jun-12	03-Sep-12	Folfox	3months	6	chemo completion	28	28	no	no	No		12-Oct-20	101.0	101.0	2	3	1											Wt	Wt	Wt	Mutant	Wt	Wt	Wt	Wt	Wt
104	male	sigmoid	left	IIIB	0	16-Jun-1942	70	19-Oct-12	yes	11-Nov-2012	yes	02-Jan-13	02-Jan-13	29-May-13	Folfox	6months	10	refused further treatment	32	32	no	no	No		03-Dec-19	84.0	84.0	2	3	1											Wt	Wt	Wt	Mutant	Wt	Wt	Wt	Wt	Wt
105	male	sigmoid	left	IIIC	0	14-Aug-1966	49	10-Apr-16	yes	19-Nov-2012	yes	04-Jan-13	18-Jan-13	26-Jun-13	Folfox	6months	12	chemo completion	21	21	no	no	Yes	12-Jan-16	22-Oct-20	37.0	95.0	2	4	1	MSI-High	Hetero	Wt	Hetero	Wt	Homo	Hetero	Hetero	Hetero	Hetero	Wt	Wt	Wt	Mutant	Wt	Wt	Wt	Wt	Wt
106	female	cecum	right	IIIB	1	12-Oct-1937	81	18-Jan-19	yes	24-Dec-2012	yes	04-Feb-13	04-Feb-13	29-Jul-13	Folfox	6months	12	chemo completion	14	14	no	yes	No		28-Jan-20	85.0	85.0	2	3	1											Wt	Wt	Wt	Mutant	Wt	Wt	Wt	Mutant	Wt
107	female	ascending	right	IIA	0	02-Apr-1948	60	04-Mar-09	yes	28-Jul-2012	yes	03-Sep-12	10-Sep-12	18-Feb-13	Folfox	6months	12	chemo completion	21	21	no	no	No		23-Jan-19	77.0	77.0	2	3	1											Wt	Wt	Wt	Mutant	Mutant	Wt	Wt	Wt	Mutant
108	female	sigmoid	left	IIIB	0	01-Jul-1964	52	04-Jul-16	yes	27-May-2011	yes	01-Jun-11	29-Jun-11	05-Sep-11	Folfox	3months	6	chemo completion	19	19	no	no	Yes	01-Jul-19	02-Nov-20	97.0	113.0	2	3	2	MSI-Stable										Wt	Wt	Wt	Mutant	Wt	Wt	Wt	Wt	Mutant
109	male	ascending	right	IIIB	0	12-Dec-1945	61	30-Aug-07	yes	10-Oct-2012	yes	15-Nov-12	29-Nov-12	10-May-13	Folfox	6months	12	chemo completion	16	16	no	no	No		20-Dec-17	62.0	62.0	2	3	1											Wt	Wt	Wt	Wt	Mutant	Wt	Wt	Wt	Wt
110	male	sigmoid	left	IIIB	0	25-Jan-1951	67	06-Sep-18	yes	07-Sep-2012	yes	18-Oct-12	15-Nov-12	11-Apr-13	Capox	6months	8	chemo completion	45	45	no	no	No		06-Oct-20	96.0	96.0	2	4	1	MSI-Stable										Wt	Wt	Wt	Mutant	Wt	Wt	Wt	Wt	Wt
111	female	transverse	left	IIC	1	17-Nov-1932	84	11-May-17	yes	16-Nov-2012	yes	18-Dec-12	18-Dec-12	14-May-13	Capox	6months	8	chemo completion	17	17	no	no	Yes	13-Aug-17	13-Jul-19	56.0	79.0	2	3	1	MSI-Stable										Wt	Wt	Wt	Mutant	Wt	Wt	Wt	Wt	Wt
112	male	cecum	right	IIIB	0	04-Mar-1945	72	22-Jan-18	yes	24-Jun-2010	yes	09-Jul-10	09-Jul-10	13-Dec-10	Capox	6months	8	chemo completion	14	14	no	no	No		14-Jul-20	120.0	120.0	2	3	1	MSI-Stable										Wt	Wt	Wt	Mutant	Wt	Wt	Wt	Wt	Wt
113	male	sigmoid	left	IIIB	0	20-Feb-1941	70	10-Nov-11	yes	02-Feb-2011	yes	07-Mar-11	17-Mar-11	02-Jun-11	Folfox	3months	6	chemo completion	22	22	no	no	No		25-Aug-20	102.0	102.0	2	3	1	MSI-High	Hetero	Wt	Hetero	Hetero	Hetero	Hetero	Hetero	Hetero	Hetero	Wt	Wt	Wt	Mutant	Wt	Wt	Wt	Wt	Wt
114	male	sigmoid	left	IIB	1	31-Jan-1954	55	29-Apr-09	yes	28-Sep-2012	yes	04-Nov-12	05-Nov-12	01-Apr-13	Capox	6months	8	chemo completion	15	15	no	no	No		01-Aug-15	34.0	34.0	2	3	2		Homo	Wt	Hetero	Hetero	Hetero	Hetero	Hetero	Homo	Homo	Wt	Wt	Wt	Mutant	Mutant	Wt	Wt	Wt	Wt
115	male	descending	left	IIIC	0	06-Oct-1945	73	12-Nov-18	yes	03-Dec-2012	yes	10-Jan-12	28-Jan-13	01-Apr-13	Capox	3months	4	chemo completion	15	15	no	no	Yes	11-Feb-19	20-Oct-20	74.0	94.0	2	3	1	MSI-High										Wt	Mutant	Wt	Mutant	Mutant	Wt	Mutant	Wt	Wt
116	female	sigmoid	left	IIIB	0	11-Aug-1970	48	19-Jul-19	yes	04-Jan-2013	yes	11-Feb-13	04-Mar-13	07-May-13	Capox	3months	4	chemo completion	19	19	no	no	No		02-Jul-20	89.0	89.0	2	3	1											Wt	Wt	Wt	Mutant	Wt	Wt	Wt	Wt	Mutant
117	male	sigmoid	left	IIIB	0	15-Nov-1939	68	15-Feb-08	yes	01-May-2012	yes	07-Jun-12	07-Jun-12	21-Nov-12	Capox	6months	8	chemo completion	14	14	no	no	No		19-May-13	12.0	12.0	2	3	2	MSI-Stable										Wt	Wt	Wt	Mutant	Wt	Wt	Wt	Wt	Wt
118	male	descending	left	IIA	0	26-Jan-1950	60	11-Mar-10	yes	25-Feb-2013	yes	08-Apr-13	15-Apr-13	11-Sep-13	Capox	6months	8	chemo completion	22	22	no	no	No		25-Sep-13	7.0	7.0	2	4	1											Wt	Wt	Wt	Mutant	Wt	Wt	Wt	Mutant	Wt
119	male	sigmoid	left	IIIA	0	15-Apr-1943	68	22-Aug-11	yes	24-Jan-2013	yes	27-Feb-13	27-Feb-13	22-Aug-13	Folfox	6months	12	chemo completion	26	26	no	no	No		21-Oct-20	92.0	92.0	2	4	2		Hetero	Hetero	Wt	Hetero	Hetero	Homo	Homo	Homo	Homo	Wt	Wt	Wt	Mutant	Wt	Wt	Wt	Wt	Wt
120	male	sigmoid	left	IIIC	0	14-Jul-1976	42	07-Jun-19	yes	17-Jan-2013	yes	27-Feb-13	06-Mar-13	22-Sep-13	Capox	6months	8	chemo completion	42	42	no	no	Yes	26-Jun-19	20-Oct-20	77.0	93.0	2	3	1	MSI-Stable										Wt	Wt	Wt	Mutant	Wt	Wt	Wt	Wt	Mutant
121	male	sigmoid	left	IIIB	0	20-Aug-1951	61	11-Mar-13	yes	21-Apr-2013	yes	23-May-13	03-Jun-13	12-Aug-13	Folfox	3months	6	chemo completion	15	15	no	no	Yes	14-Oct-19	09-Sep-20	77.0	88.0	2	3	1	MSI-Stable										Wt	Wt	Wt	Mutant	Mutant	Wt	Wt	Wt	Wt
122	male	cecum	right	IIA	1	05-Mar-1938	71	22-Sep-09	yes	15-Oct-2012	yes	02-Nov-12	12-Nov-12	13-May-13	Folfox	6months	12	chemo completion	13	13	no	no	No		29-Aug-16	15.0	46.0	2	3	2											Wt	Wt	Wt	Mutant	Wt	Wt	Wt	Wt	Wt
123	male	sigmoid	left	IIIC	0	25-May-1952	67	21-Apr-20	yes	17-Feb-2011	yes	18-Mar-11	23-Mar-11	12-Aug-11	Folfox	6months	6	toxicity	14	14	no	no	No		05-Oct-20	115.0	115.0	2	4	2	MSI-Stable										Wt	Wt	Wt	Mutant	Wt	Wt	Wt	Wt	Mutant
124	female	sigmoid	left	IIIB	1	11-Apr-1950	61	21-Jun-11	yes	06-Oct-2010	yes	29-Oct-10	29-Oct-10	29-Mar-11	Capox	6months	8	chemo completion	12	12	no	no	No		15-Nov-11	13.0	13.0	2	3	1											Mutant	Wt	Wt	Wt	Wt	Mutant	Mutant	Wt	Mutant
125	male	transverse	left	IIIB	0	02-Oct-1957	61	04-Feb-19	yes	22-Feb-2013	yes	25-Mar-13	02-Apr-13	11-Jun-13	Folfox	3months	6	chemo completion	14	14	no	no	No		04-Aug-20	89.0	89.0	2	3	1	MSI-Stable										Wt	Wt	Wt	Mutant	Wt	Wt	Wt	Wt	Wt
126	female	ascending	right	IIIC	0	10-Dec-1953	64	11-Oct-18	yes	20-Nov-2012	yes	03-Jan-13	24-Jan-13	24-Jun-13	Capox	6months	8	chemo completion	13	13	no	no	Yes	28-Jul-20	22-Oct-20	92.0	95.0	2	3	1	MSI-Stable										Wt	Wt	Wt	Wt	Wt	Wt	Wt	Wt	Wt
127	female	transverse	left	IIIA	0	14-Nov-1951	67	16-Jul-19	yes	29-Apr-2013	yes	05-Jun-13	05-Jun-13	14-Aug-13	Folfox	3months	6	chemo completion	18	18	no	no	No		13-Oct-20	89.0	89.0	2	3	1	MSI-Stable										Wt	Wt	Wt	Mutant	Wt	Wt	Wt	Wt	Mutant
128	male	ascending	right	IIIB	0	17-Aug-1945	72	04-Jun-18	yes	27-Mar-2013	yes	24-Apr-13	15-May-13	18-Jul-13	Capox	3months	4	chemo completion	21	21	no	no	Yes	27-Jun-19	02-Nov-20	75.0	91.0	2	3	2	MSI-Stable										Wt	Wt	Wt	Mutant	Wt	Wt	Wt	Wt	Wt
129	male	sigmoid	left	IIC	0	25-Mar-1972	45	26-Nov-17	yes	23-May-2013	yes	01-Jul-13	07-Jul-13	03-Oct-13	Capox	3months	4	chemo completion	17	17	no	no	Yes	03-Jan-19	10-Mar-20	67.0	81.0	2	3	1	MSI-Stable										Wt	Wt	Wt	Wt	Wt	Wt	Wt	Wt	Wt
130	female	sigmoid	left	IIB	0	02-Nov-1956	54	10-Jan-11	yes	01-Feb-2013	yes	06-Mar-13	20-Mar-13	23-Aug-13	Folfox	6months	12	chemo completion	15	15	no	no	No		09-Jul-14	17.0	17.0	2	3	1		Wt	Hetero	Hetero	Hetero	Hetero	Hetero	Hetero	Homo	Homo	Wt	Wt	Wt	Mutant	Wt	Wt	Wt	Wt	Wt
131	female	sigmoid	left	IIB	0	28-Jan-1938	73	10-May-11	yes	11-Jun-2013	yes	08-Jul-13	15-Jul-13	23-Sep-13	Folfox	3months	6	chemo completion	16	16	no	no	No		27-May-19	71.0	71.0	2	2	1		Homo	Wt	Hetero	Homo	Homo	Hetero	Hetero	Homo	Homo	Wt	Wt	Wt	Mutant	Wt	Wt	Wt	Wt	Mutant
132	female	cecum	right	IIA	0	12-Sep-1949	60	24-Sep-09	yes	12-Mar-2013	yes	11-Apr-13	11-Apr-13	11-Sep-13	Folfox	6months	12	chemo completion	24	24	no	no	No		14-Mar-18	60.0	60.0	2	3	1		Homo	Wt	Hetero	Homo	Homo	Hetero	Hetero	Homo	Homo	Wt	Wt	Wt	Mutant	Wt	Wt	Wt	Wt	Mutant
133	male	sigmoid	left	IIC	1	01-Jul-1941	72	22-Apr-13	yes	22-May-2013	yes	04-Jul-13	04-Jul-13	13-Dec-13	Capox	6months	8	chemo completion	14	14	no	no	No			78.0	78.0	2	3	3											Wt	Wt	Wt	Mutant	Wt	Wt	Wt	Wt	Wt
134	male	cecum	right	IIIB	0	07-Oct-1935	73	28-Jul-09	yes	03-Apr-2013	yes	07-May-13	21-May-13	23-Jul-13	Capox	3months	4	chemo completion	21	21	no	no	No		29-Feb-20	82.0	82.0	2	2	1		Hetero	Hetero	Wt	Hetero	Homo	Hetero	Hetero	Hetero	Hetero	Wt	Wt	Wt	Mutant	Wt	Wt	Wt	Wt	Mutant
135	female	descending	left	IIIA	0	20-Jan-1979	38	03-Apr-17	yes	26-Apr-2013	yes	23-May-13	23-May-13	26-Jul-13	Capox	3months	4	chemo completion	21	21	no	no	No		09-Jun-20	85.0	85.0	2	3	2											Wt	Wt	Wt	Mutant	Mutant	Wt	Wt	Wt	Mutant
136	female	cecum	right	IIIC	0	01-Jul-1937	71	01-May-09	yes	17-May-2013	yes	22-Jul-13	22-Jul-13	23-Dec-13	Capox	6months	8	chemo completion	19	19	no	no	No		24-Jul-13	2.0	2.0	2	3	2		Homo	Wt	Wt	Wt	Homo	Hetero	Hetero	Hetero	Hetero	Wt	Wt	Wt	Mutant	Wt	Wt	Wt	Wt	Wt
137	male	descending	left	IIIB	0	17-May-1955	58	04-Feb-14	yes	23-Aug-2013	yes	07-Oct-13	14-Oct-13	02-Jan-14	Folfox	3months	6	chemo completion	22	22	no	yes	No		02-Jul-20	82.0	82.0	2	3	1
138	male	ascending	right	IIIB	0	25-Jan-1974	36	05-Feb-10	yes	23-Aug-2013	yes	30-Sep-13	14-Oct-13	15-Apr-14	Folfox	6months	11	chemo completion	24	24	no	no	No		27-Nov-14	15.0	15.0	2	3	2		Hetero	Homo	Hetero	Homo	Hetero	Homo	Homo	Hetero	Hetero	Wt	Wt	Wt	Mutant	Wt	Wt	Wt	Wt	Wt
139	female	ascending	right	IIIB	0	06-Nov-1953	61	21-Aug-15	yes	02-Oct-2013	yes	29-Oct-13	30-Oct-13	09-Apr-14	Folfox	6months	12	chemo completion	36	36	no	no	Yes	30-Nov-15	20-Oct-20	25.0	84.0	2	3	2	MSI-Stable										Wt	Wt	Wt	Mutant	Wt	Wt	Wt	Wt	Wt
140	female	descending	left	IIIB	1	15-Aug-1952	58	16-Aug-10	yes	19-Jul-2013	yes	21-Aug-13	11-Sep-13	11-Sep-13	Capox	3months	1	toxicity	13	13	no	no	No		27-Jan-15	18.0	18.0	2	3	1	MSI-Stable	Hetero	Hetero	Hetero	Homo	Homo	Hetero	Hetero	Homo	Homo	Wt	Wt	Wt	Mutant	Wt	Wt	Wt	Wt	Wt
141	male	ascending	right	IIIC	0	06-Sep-1951	62	06-May-14	yes	30-Dec-2010	yes	03-Feb-11	10-Feb-11	10-Feb-11	Capox	6months	1	toxicity	14	14	no	no	Yes	04-May-14	02-Apr-15	40.0	51.0	2	4	1	MSI-Stable
142	female	descending	left	IIIB	1	01-Feb-1939	74	13-Sep-13	yes	04-Oct-2013	yes	05-Nov-13	12-Nov-13	28-Jan-14	Folfox	3months	4	chemo completion	30	30	no	no	No		20-Aug-20	82.0	82.0	2	3	1											Wt	Wt	Wt	Mutant	Wt	Wt	Wt	Wt	Wt
143	male	ascending	right	IIIB	0	06-Feb-1959	59	26-Mar-18	yes	17-Sep-2013	yes	07-Nov-13	14-Nov-13	23-Apr-14	Capox	6months	8	chemo completion	22	22	no	yes	No		06-Oct-20	84.0	84.0	2	3	1											Mutant	Wt	Wt	Mutant	Wt	Wt	Wt	Wt	Wt
144	male	cecum	right	IIA	1	06-Jul-1939	67	01-May-07	yes	25-Sep-2013	yes	12-Nov-13	12-Nov-13	28-Apr-14	Folfox	6months	12	chemo completion	18	18	no	no	No		11-Apr-13	7.0	7.0	2	3	1		Hetero	Wt	Hetero	Hetero	Homo	Homo	Homo	Homo	Homo	Wt	Wt	Wt	Mutant	Wt	Wt	Wt	Wt	Wt
145	female	cecum	right	IIIC	1	04-Apr-1933	74	11-Feb-08	yes	09-May-2011	yes	06-Jun-11	06-Jun-11	22-Nov-11	Folfox	6months	12	chemo completion	12	12	no	no	No		28-Sep-10	6.0	6.0	2	3	2	MSI-Stable	Wt	Wt	Wt	Hetero	Hetero	Hetero	Hetero	Hetero	Hetero	Wt	Wt	Wt	Mutant	Wt	Wt	Wt	Wt	Wt
146	male	ascending	right	IIIB	0	15-Oct-1944	66	16-Sep-11	yes	27-Aug-2010	yes	01-Oct-10	20-Oct-10	21-Mar-11	Folfox	6months	12	chemo completion	21	21	no	no	No		04-Nov-19	110.0	110.0	2	3	2		Hetero	Wt	Wt	Wt	Hetero	Homo	Homo	Homo	Homo
147	female	sigmoid	left	IIIC	0	26-Feb-1962	56	27-Oct-18	yes	11-Apr-2012	yes	15-May-12	22-May-12	22-Nov-12	Folfox	6months	12	chemo completion	13	13	no	no	Yes	22-Dec-18	21-Oct-19	80.0	90.0	2	3	1	MSI-Stable										Wt	Wt	Wt	Wt	Wt	Wt	Wt	Wt	Mutant
148	female	sigmoid	left	IIIB	0	28-Aug-1956	61	30-Jul-18	yes	30-Aug-2013	yes	01-Oct-13	07-Oct-13	02-Jan-14	Folfox	3months	6	chemo completion	25	25	no	no	Yes	30-Jul-19	27-Oct-20	71.0	85.0	2	4	2	MSI-Stable										Wt	Wt	Wt	Mutant	Wt	Wt	Wt	Wt	Wt
149	male	cecum	right	IIIB	0	19-Feb-1961	58	27-Nov-19	yes	26-Jul-2013	yes	27-Aug-13	11-Sep-13	20-Feb-14	Capox	6months	8	chemo completion	12	12	no	no	No		06-Oct-20	86.0	86.0	2	3	2											Wt	Wt	Wt	Mutant	Wt	Wt	Wt	Wt	Wt
150	female	sigmoid	left	IIB	0	12-May-1950	69	05-Dec-19	yes	19-Jul-2013	yes	14-Sep-13	24-Sep-13	12-Dec-13	Folfox	3months	6	chemo completion	18	18	no	no	No		25-Jun-20	83.0	83.0	2	3	1											Wt	Wt	Wt	Mutant	Mutant	Wt	Wt	Wt	Mutant
151	male	ascending	right	IIA	0	21-May-1959	59	19-Sep-18	yes	29-Oct-2013	yes	04-Dec-13	11-Dec-13	18-Feb-14	Capox	3months	4	chemo completion	27	27	no	no	Yes	17-Jan-19	21-Sep-20	62.0	82.0	2	3	2	MSI-Stable										Wt	Wt	Wt	Mutant	Wt	Wt	Wt	Wt	Mutant
152	male	sigmoid	left	IIIB	0	05-Aug-1972	46	30-Apr-19	yes	10-Aug-2013	yes	16-Oct-13	23-Oct-13	21-Mar-14	Capox	6months	8	chemo completion	18	18	no	no	Yes	19-May-20	18-Nov-20	81.0	87.0	2	3	1	MSI-Stable										Wt	Wt	Wt	Wt	Wt	Wt	Wt	Wt	Wt
153	male	sigmoid	left	IIB	0	03-Aug-1947	59	14-Mar-07	yes	16-Oct-2013	yes	19-Nov-13	22-Nov-13	03-Feb-14	Capox	3months	4	chemo completion	13	13	no	no	No		31-Jul-13	3.0	3.0	2	3	1											Wt	Wt	Mutant	Mutant	Wt	Wt	Wt	Wt	Mutant
154	male	descending	left	IIIC	1	01-Jul-1943	63	22-May-07	yes	28-Jun-2013	yes	05-Aug-13	09-Aug-13	18-Oct-13	Capox	3months	4	chemo completion	20	20	no	no	No		24-Mar-17	44.0	44.0	2	3	2	MSI-High	Hetero	Wt	Wt	Hetero	Hetero	Hetero	Hetero	Hetero	Hetero	Wt	Wt	Wt	Mutant	Wt	Wt	Wt	Wt	Mutant
155	male	descending	left	IIIB	0	28-Aug-1942	71	21-Nov-13	yes	25-Nov-2013	yes	15-Jan-14	15-Jan-14	17-Apr-14	Folfox	3months	6	chemo completion	39	39	no	no	No		07-Sep-20	81.0	81.0	2	3	1											Wt	Wt	Wt	Mutant	Wt	Wt	Wt	Wt	Wt
156	male	descending	left	IIIB	1	21-Mar-1953	55	20-Aug-08	yes	22-Nov-2013	yes	16-Jan-14	16-Jan-14	24-Mar-14	Capox	3months	4	chemo completion	15	15	no	no	No		19-Mar-15	15.0	15.0	2	3	1		Hetero	Wt	Hetero	Hetero	Homo	Homo	Homo	Hetero	Hetero	Wt	Wt	Wt	Mutant	Mutant	Wt	Wt	Wt	Wt
157	male	sigmoid	left	IIIB	0	07-Jun-1951	68	07-Nov-19	yes	20-Jan-2014	yes	25-Feb-14	12-Mar-14	04-Jun-14	Folfox	3months	6	chemo completion	18	18	no	no	Yes	24-Feb-19	03-Nov-20	61.0	81.0	2	3	1	MSI-Stable										Wt	Wt	Wt	Mutant	Wt	Mutant	Wt	Wt	Wt
158	male	sigmoid	left	IIIB	0	16-Jun-1961	58	30-Oct-19	yes	26-Jul-2013	yes	03-Sep-13	12-Sep-13	14-Nov-13	Capox	3months	4	chemo completion	15	15	no	no	No		15-Jun-20	82.0	82.0	2	3	1	MSI-Stable										Wt	Wt	Wt	Mutant	Mutant	Wt	Wt	Wt	Mutant
159	male	descending	left	IIIB	0	04-Dec-1948	68	07-Apr-17	yes	27-Dec-2013	yes	16-Jan-14	23-Jan-14	27-Mar-14	Capox	3months	4	chemo completion	16	16	no	no	No		15-Dec-20	83.0	83.0	2	3	1	MSI-Stable										Wt	Wt	Wt	Mutant	Wt	Wt	Wt	Wt	Wt
160	female	sigmoid	left	IIIB	0	23-Dec-1932	75	23-May-08	yes	11-Apr-2013	yes	17-May-13	21-May-13	23-Sep-13	Folfox	6months	9	toxicity	13	13	no	no	No		12-Aug-11	5.0	5.0	2	4	1		Hetero	Hetero	Wt	Hetero	Hetero	Homo	Homo	Homo	Homo	Wt	Wt	Wt	Mutant	Wt	Wt	Wt	Wt	Mutant
161	male	sigmoid	left	IIIB	0	06-Aug-1936	71	31-Oct-07	yes	13-Jan-2014	yes	15-Feb-14	18-Feb-14	25-Jun-14	Capox	6months	7	toxicity	39	39	no	no	No		10-Jul-13	5.0	5.0	2	4	2											Wt	Wt	Wt	Wt	Wt	Wt	Wt	Wt	Wt
162	male	ascending	right	IIIC	1	12-Aug-1942	69	03-Oct-11	yes	15-Jan-2014	yes	17-Feb-14	17-Feb-14	28-Apr-14	Capox	3months	3	chemo completion	19	19	no	no	No		06-Apr-19	62.0	62.0	2	4	2	MSI-Stable
163	male	sigmoid	left	IIIB	0	10-Jul-1963	54	29-Jun-18	yes	10-Feb-2014	yes	17-Mar-14	17-Mar-14	17-Mar-14	Capox	3months	1	refused further treatment	25	25	no	no	No		15-Oct-20	80.0	80.0	2	3	1											Wt	Wt	Wt	Mutant	Wt	Wt	Wt	Wt	Wt
164	female	cecum	right	IIIB	1	29-Jan-1953	56	29-Sep-09	yes	09-Sep-2013	yes	15-Oct-13	18-Oct-13	14-Mar-14	Capox	6months	8	chemo completion	22	22	no	no	Yes	18-Jan-11	18-Jan-11	6.0	6.0	2	2	1	MSI-Stable	Hetero	Wt	Hetero	Hetero	Homo	Homo	Homo	Homo	Homo	Wt	Wt	Wt	Mutant	Wt	Wt	Wt	Wt	Wt
165	male	sigmoid	left	IIIB	2	18-Nov-1945	60	18-Sep-06	yes	01-Feb-2014	yes	04-Mar-14	18-Mar-14	27-May-14	Folfox	3months	6	chemo completion	15	15	no	no	No		16-Jul-10	3.0	3.0	2	3	2		Hetero	Wt	Wt	Hetero	Homo	Homo	Homo	Homo	Homo	Wt	Wt	Wt	Mutant	Mutant	Wt	Wt	Wt	Wt
166	female	cecum	right	IIIB	0	14-Aug-1939	70	09-Nov-09	yes	13-Dec-2012	yes	21-Jan-13	21-Jan-13	26-Jul-13	Capox	6months	8	chemo completion	26	26	no	no	No		20-Nov-13	11.0	11.0	2	4	2		Hetero	Hetero	Wt	Hetero	Hetero	Hetero	Hetero	Homo	Homo	Wt	Wt	Wt	Wt	Wt	Wt	Mutant	Wt	Mutant
167	female	transverse	left	IIIB	1	20-Jun-1934	73	23-Nov-07	yes	10-Mar-2014	yes	25-Apr-14	25-Apr-14	02-Jul-14	Folfox	6months	6	chemo completion	65	65	no	no	No		04-Nov-13	3.0	3.0	2	3	2	MSI-Stable	Hetero	Wt	Hetero	Hetero	Homo	Hetero	Hetero	Hetero	Hetero	Wt	Wt	Wt	Mutant	Mutant	Wt	Wt	Wt	Mutant
168	female	ascending	right	IIB	0	23-Sep-1959	48	01-Aug-08	yes	14-Apr-2014	yes	26-May-14	27-May-14	04-Nov-14	Folfox	6months	12	chemo completion	22	22	no	no	No		13-Jul-20	74.0	74.0	2	3	1	MSI-Stable	Wt	Wt	Hetero	Hetero	Hetero	Hetero	Hetero	Hetero	Hetero	Wt	Wt	Wt	Mutant	Wt	Wt	Wt	Wt	Wt
169	female	cecum	right	IIIC	0	19-Apr-1937	79	15-Aug-16	yes	27-Jul-2011	yes	19-Sep-11	20-Sep-11	21-Nov-11	Capox	3months	4	chemo completion	22	22	no	no	Yes	03-Sep-16	05-Aug-17	61.0	72.0	2	3	1	MSI-Stable										Wt	Wt	Wt	Mutant	Wt	Wt	Wt	Wt	Wt
170	female	sigmoid	left	IIIB	0	01-Feb-1957	55	08-Oct-12	yes	19-Mar-2012	yes	16-Apr-12	19-Apr-12	29-Oct-12	Folfox	6months	12	chemo completion	24	24	no	no	Yes	23-Oct-14	03-Dec-20	31.0	104.0	2	3	2	MSI-Stable										Wt	Wt	Wt	Mutant	Wt	Wt	Wt	Wt	Mutant
171	female	sigmoid	left	IIC	0	20-Apr-1964	53	01-Dec-17	yes	28-Apr-2015	yes	26-May-15	29-May-15	31-Jul-15	Capox	3months	4	chemo completion	12	12	no	no	Yes	22-Nov-17	02-Dec-20	30.0	67.0	2	2	1	MSI-Stable										Mutant	Wt	Wt	Mutant	Wt	Wt	Wt	Wt	Wt
172	male	descending	left	IIIB	0	09-Nov-1935	75	15-Dec-10	yes	16-Jan-2014	yes	24-Feb-14	13-Mar-14	15-May-14	Capox	3months	4	chemo completion	12	12	no	no	No		08-Mar-16	25.0	25.0	2	4	1	MSI-Stable	Wt	Wt	Wt	Hetero	Hetero	Hetero	Hetero	Hetero	Hetero	Wt	Wt	Wt	Mutant	Wt	Wt	Wt	Wt	Wt
173	male	cecum	right	IIIB	0	20-Mar-1950	60	25-Nov-10	yes	22-Oct-2014	yes	15-Dec-14	19-Dec-14	16-Mar-15	Folfox	3months	6	chemo completion	18	18	no	no	Yes	15-Dec-17	19-Oct-20	37.0	71.0	2	3	2											Wt	Wt	Wt	Mutant	Wt	Wt	Wt	Wt	Wt
174	male	sigmoid	left	IIA	0	23-Jul-1933	76	28-Jun-10	yes	09-Sep-2012	yes	15-Oct-12	23-Oct-12	28-Mar-13	Folfox	6months	12	chemo completion	12	12	no	no	No		19-Nov-20	98.0	98.0	2	4	1		Wt	Wt	Wt	Wt	Hetero	Homo	Homo	Hetero	Hetero	Wt	Wt	Wt	Wt	Wt	Mutant	Mutant	Wt	Mutant
175	male	sigmoid	left	IIIC	0	10-Apr-1959	60	20-Feb-20	yes	25-Apr-2014	yes	02-Jun-14	18-Jun-14	20-Aug-14	Capox	3months	4	chemo completion	35	35	no	no	Yes	18-Apr-19	20-Oct-20	59.0	77.0	2	4	1	MSI-Stable										Wt	Wt	Wt	Wt	Wt	Wt	Wt	Wt	Wt
176	male	sigmoid	left	IIIB	0	14-Aug-1956	54	31-Dec-10	yes	31-Dec-2010	yes	08-Feb-11	11-Feb-11	23-Jul-11	Folfox	6months	12	chemo completion	33	33	no	no	No		30-Nov-17	82.0	82.0	2	3	1											Wt	Wt	Wt	Mutant	Wt	Mutant	Wt	Wt	Wt
177	male	sigmoid	left	IB	0	05-Feb-1951	68	03-Jan-20	yes	26-Aug-2014	yes	30-Sep-14	15-Oct-14	23-Mar-15	Folfox	6months	12	chemo completion	17	17	no	yes	Yes	02-Jan-20	24-Nov-20	64.0	74.0	2	4	1	MSI-Stable										Wt	Wt	Wt	Mutant	Mutant	Wt	Wt	Wt	Mutant
178	male	sigmoid	left	IIIA	0	01-Jul-1954	60	12-Feb-15	yes	10-Mar-2015	yes	19-May-15	20-May-15	25-Nov-15	Folfox	6months	12	chemo completion	12	12	no	no	No		10-Apr-08	37.0	37.0	2	3	1		Wt	Homo	Wt	Wt	Hetero	Homo	Homo	Hetero	Hetero
179	male	sigmoid	left	IIIB	0	05-Aug-1956	49	06-Jul-06	yes	02-Oct-2013	yes	12-Nov-13	02-Dec-13	12-Jun-14	Folfox	6months	12	chemo completion	22	22	no	no	No		18-Apr-16	30.0	30.0	2	3	2											Wt	Wt	Wt	Wt	Wt	Wt	Wt	Mutant	Wt
180	male	sigmoid	left	IIB	0	08-Jun-1949	58	20-Dec-07	yes	08-Dec-2011	yes	18-Jan-12	23-Jan-12	07-May-12	Capox	6months	6	toxicity	12	12	no	no	No		29-Nov-17	71.0	71.0	1	3	1	MSI-Stable	Wt	Hetero	Hetero	Hetero	Homo	Homo	Homo	Homo	Homo	Wt	Wt	Wt	Mutant	Wt	Wt	Wt	Wt	Mutant
181	female	descending	left	IIIB	0	01-Jul-1940	68	01-Dec-08	yes	15-Sep-2011	yes	18-Oct-11	31-Oct-11	03-Apr-12	Folfox	6months	12	chemo completion	28	28	no	no	No		16-Jun-14	33.0	33.0	2	3	2		Wt	Hetero	Hetero	Hetero	Hetero	Homo	Homo	Hetero	Hetero
182	male	sigmoid	left	IIA	0	21-May-1944	65	07-Apr-10	yes	01-Jul-2014	yes	22-Jul-14	28-Jul-14	05-Jan-15	Folfox	6months	12	chemo completion	18	18	no	yes	Yes	04-Sep-17	02-Oct-17	38.0	39.0	1	4	1		Wt	Hetero	Wt	Hetero	Homo	Hetero	Hetero	Hetero	Hetero	Wt	Wt	Wt	Mutant	Wt	Wt	Wt	Mutant	Wt
183	male	transverse	left	IIIC	1	02-Jan-1941	73	12-Nov-14	yes	04-Mar-2013	yes	08-Apr-13	09-Apr-13	18-Jun-13	Folfox	3months	6	chemo completion	13	13	no	no	Yes	21-Dec-14	01-Jun-17	21.0	50.0	2	3	2	MSI-Stable										Wt	Wt	Wt	Mutant	Mutant	Wt	Wt	Wt	Mutant
184	male	sigmoid	left	IIIB	0	01-Oct-1935	69	23-Nov-04	yes	04-Apr-2013	yes	09-May-13	13-May-13	18-Oct-13	Folfox	6months	12	chemo completion	31	31	no	no	No		10-Mar-10	6.0	6.0	2	3	1		Hetero	Wt	Hetero	Hetero	Homo	Hetero	Hetero	Homo	Homo	Wt	Wt	Wt	Mutant	Wt	Wt	Wt	Wt	Mutant
185	male	cecum	right	IIIC	0	15-Sep-1944	68	20-Sep-12	yes	04-Nov-2013	yes	10-Dec-13	16-Dec-13	10-Mar-14	Folfox	3months	6	chemo completion	19	19	yes	no	No		11-Feb-14	3.0	3.0	2	3	2	MSI-Stable										Wt	Wt	Wt	Mutant	Wt	Wt	Mutant	Wt	Wt
186	female	transverse	left	IIIA	0	07-Apr-1957	61	16-Jan-19	yes	03-Aug-2014	yes	08-Sep-14	18-Sep-14	23-Feb-15	Folfox	6months	12	chemo completion	40	40	no	no	No		29-Sep-20	73.0	73.0	2	4	1											Wt	Wt	Wt	Mutant	Wt	Mutant	Wt	Wt	Mutant
187	female	cecum	right	IIIB	0	02-Mar-1936	83	20-Aug-19	yes	26-Nov-2014	yes	08-Jan-15	20-Jan-15	23-Jun-15	Folfox	6months	12	chemo completion	30	30	no	no	No		29-Jun-20	67.0	67.0	2	3	1	MSI-High										Wt	Wt	Wt	Mutant	Wt	Wt	Wt	Mutant	Wt
188	male	ascending	right	IIIC	1	01-Jan-1927	79	27-Oct-06	yes	07-Dec-2012	yes	14-Jan-13	22-Jan-13	09-Apr-13	Folfox	3months	6	chemo completion	12	12	no	no	No		12-Sep-09	81.0	81.0	2	3	2											Wt	Wt	Wt	Wt	Wt	Wt	Wt	Wt	Wt
189	female	sigmoid	left	IIC	1	01-Jul-1943	71	03-May-14	yes	03-Jun-2014	yes	07-Jul-14	10-Jul-14	13-Oct-14	Capox	3months	4	chemo completion	14	14	no	no	No					2	2	1	MSI-Stable										Wt	Wt	Wt	Mutant	Wt	Wt	Wt	Wt	Mutant
190	male	descending	left	IIA	0	23-May-1943	64	14-Nov-07	yes	18-Mar-2011	yes	25-Apr-11	27-Apr-11	23-May-11	Capox	3months	2	toxicity	18	18	no	no	No		26-Oct-09	103.0	103.0	2	3	2											Wt	Wt	Wt	Mutant	Wt	Wt	Wt	Wt	Wt
191	male	ascending	right	IIIB	0	16-Apr-1952	67	26-Jul-19	yes	01-Jun-2012	yes	05-Jul-12	23-Jul-12	08-Oct-12	Capox	3months	4	chemo completion	18	18	no	no	No		18-Nov-20	101.0	101.0	2	3	2											Wt	Wt	Wt	Wt	Wt	Wt	Wt	Wt	Wt
192	female	ascending	right	IIIC	1	03-Dec-1933	74	11-Dec-07	yes	26-Mar-2012	yes	28-Apr-12	11-May-12	25-Jul-12	Capox	3months	4	chemo completion	27	27	no	no	No		22-Jul-20	99.0	99.0	2	4	2	MSI-Stable	Hetero	Wt	Hetero	Homo	Hetero	Homo	Homo	Hetero	Hetero	Wt	Wt	Wt	Mutant	Wt	Wt	Wt	Wt	Wt
193	male	descending	left	IIIC	0	26-Jan-1972	42	06-Aug-14	yes	25-Jul-2014	yes	23-Sep-14	29-Sep-14	29-Dec-14	Folfox	3months	6	chemo completion	28	28	yes	no	Yes	12-Jan-19	22-Sep-20	53.0	73.0	2	4	1											Wt	Mutant	Wt	Mutant	Wt	Wt	Wt	Wt	Wt
194	male	cecum	right	IIIB	1	03-Oct-1935	84	13-Dec-19	yes	14-Mar-2014	yes	24-Apr-14	29-Apr-14	30-Sep-14	Folfox	6months	12	chemo completion	19	19	no	no	No		03-Jun-20	74.0	74.0	2	3	1											Wt	Wt	Wt	Mutant	Wt	Wt	Wt	Wt	Wt
195	male	sigmoid	left	IIIB	0	15-Oct-1948	61	21-Oct-09	yes	07-Jul-2014	yes	05-Aug-14	08-Aug-14	17-Oct-14	Folfox	3months	6	chemo completion	12	12	no	no	No		09-Nov-20	76.0	76.0	1	3	1	MSI-Stable	Homo	Wt	Hetero	Wt	Homo	Hetero	Hetero	Homo	Homo	Wt	Wt	Wt	Mutant	Wt	Mutant	Wt	Wt	Wt
196	female	cecum	right	IIIB	0	26-Aug-1958	60	20-Mar-19	yes	27-Dec-2010	yes	04-Feb-11	24-Feb-11	21-Jul-11	Capox	6months	8	chemo completion	27	27	no	no	No		06-Feb-20	109.0	109.0	2	3	1											Wt	Wt	Wt	Mutant	Wt	Wt	Wt	Wt	Wt
197	male	sigmoid	left	IIB	1	11-Sep-1926	79	25-Oct-05	yes	06-Jun-2014	yes	25-Jun-14	01-Jul-14	11-Sep-14	Folfox	3months	6	chemo completion	18	18	no	no	No		11-Dec-08	54.0	54.0	2	3	2											Wt	Wt	Wt	Mutant	Mutant	Mutant	Wt	Wt	Wt
198	male	transverse	left	IIC	0	04-Aug-1955	59	29-Aug-14	yes	09-May-2014	yes	02-Jun-14	09-Jun-14	11-Aug-14	Capox	3months	4	chemo completion	22	22	yes	no	No		26-Oct-20	77.0	77.0	2	3	1											Wt	Wt	Wt	Wt	Wt	Wt	Wt	Wt	Wt
199	female	sigmoid	left	IIIB	0	08-Oct-1933	75	30-Jul-09	yes	11-Sep-2012	yes	19-Oct-12	22-Oct-12	10-Jan-14	Folfox	6months	6	chemo completion	23	23	no	no	No		08-Nov-11	15.0	15.0	2	3	1	MSI-Stable	Hetero	Wt	Hetero	Hetero	Homo	Homo	Homo	Hetero	Hetero	Wt	Wt	Wt	Wt	Wt	Wt	Wt	Wt	Wt
200	female	cecum	right	IIB	0	22-Oct-1937	70	28-Feb-08	yes	16-Dec-2014	yes	20-Jan-15	21-Jan-15	26-May-15	Folfox	6months	9	toxicity	12	12	no	no	No		15-Jul-20	66.0	66.0	2	2	1		Wt	Wt	Wt	Hetero	Hetero	Homo	Homo	Homo	Homo	Wt	Wt	Wt	Mutant	Mutant	Wt	Wt	Wt	Wt
201	male	sigmoid	left	IIA	0	12-Oct-1938	71	25-May-10	yes	12-Nov-2014	yes	15-Dec-14	24-Dec-14	25-Feb-15	Capox	3months	4	chemo completion	37	37	no	no	No		20-Nov-19	60.0	60.0	2	3	1		Hetero	Wt	Hetero	Hetero	Hetero	Hetero	Hetero	Hetero	Hetero	Wt	Wt	Wt	Mutant	Wt	Wt	Wt	Wt	Mutant
202	male	cecum	right	IIIB	1	01-Jan-1957	61	11-Jul-18	yes	03-Jun-2014	yes	09-Jul-14	21-Jul-14	07-Nov-14	Capox	3months	4	chemo completion	27	27	no	no	No		13-Oct-20	76.0	76.0	2	4	2	MSI-Stable										Wt	Wt	Wt	Mutant	Wt	Wt	Wt	Wt	Wt
203	male	sigmoid	left	IIIB	0	18-Jun-1943	76	30-Dec-19	yes	10-Dec-2010	yes	11-Feb-11	07-Feb-11	08-Jul-11	Capox	6months	8	chemo completion	13	13	no	no	No		17-Aug-20	116.0	116.0	2	3	1											Wt	Wt	Wt	Mutant	Wt	Wt	Wt	Wt	Mutant
204	male	transverse	left	IIC	1	01-Jul-1942	72	12-Nov-14	yes	12-Dec-2014	yes	19-Jan-15	11-Feb-15	15-Jul-15	Capox	6months	8	chemo completion	12	12	no	no	No					2	3	1											Wt	Wt	Wt	Mutant	Wt	Wt	Wt	Wt	Wt
205	male	ascending	right	IIB	0	27-Oct-1942	66	20-Aug-09	yes	05-Jan-2015	yes	09-Feb-15	27-Feb-15	15-Jun-15	Folfox	3months	6	chemo completion	18	18	no	no	No		29-Mar-18	38.0	38.0	2	3	1		Wt	Wt	Wt	Hetero	Hetero	Hetero	Hetero	Hetero	Hetero	Wt	Wt	Wt	Wt	Wt	Wt	Wt	Wt	Wt
206	female	transverse	left	IIIC	0	20-Jan-1954	60	26-Mar-14	yes	01-Apr-2014	yes	30-Apr-14	08-May-14	10-Sep-14	Capox	6months	8	chemo completion	18	18	no	no	No		31-Oct-17	42.0	42.0	2	3	2
207	female	sigmoid	left	IIIC	1	22-Nov-1946	61	07-Feb-08	yes	22-Jul-2013	yes	22-Aug-13	02-Sep-13	27-Jan-14	Capox	6months	8	chemo completion	26	26	no	no	No		20-Nov-13	3.0	3.0	2	3	1	MSI-Stable	Hetero	Hetero	Hetero	Hetero	Homo	Homo	Homo	Homo	Homo	Wt	Wt	Wt	Mutant	Wt	Wt	Wt	Wt	Wt
208	male	cecum	right	IIIB	0	21-Apr-1937	77	10-Dec-14	yes	10-Dec-2014	yes	03-Mar-15	09-Mar-15	18-May-15	Folfox	3months	6	chemo completion	26	26	no	no	Yes	12-Sep-17	12-Oct-18	33.0	46.0	2	3	1											Wt	Wt	Wt	Mutant	Wt	Wt	Wt	Wt	Wt
209	female	cecum	right	IIB	0	01-Oct-1950	58	31-Oct-08	yes	28-Jul-2014	yes	03-Sep-14	01-Sep-14	12-Nov-14	Folfox	3months	6	chemo completion	17	17	no	no	No		19-Aug-20	72.0	72.0	2	3	1	MSI-High	Wt	Wt	Wt	Hetero	Hetero	Hetero	Hetero	Hetero	Hetero	Wt	Wt	Wt	Mutant	Wt	Mutant	Wt	Wt	Mutant
210	male	sigmoid	left	IIC	1	17-Jul-1935	79	29-Jun-15	yes	06-Dec-2011	yes	10-Jan-12	16-Jan-12	26-Mar-12	Folfox	3months	6	chemo completion	12	12	no	no	Yes	23-Jun-15	04-Jul-17	42.0	66.0	2	2	1	MSI-Stable
211	male	sigmoid	left	IIIB	0	05-Jun-1946	64	23-May-11	yes	02-Apr-2014	yes	06-May-14	12-May-14	15-Oct-14	Folfox	6months	12	chemo completion	31	31	no	yes	No		14-Feb-19	58.0	58.0	2	4	1		Homo	Wt	Hetero	Homo	Homo	Hetero	Hetero	Homo	Homo	Wt	Wt	Wt	Mutant	Wt	Wt	Wt	Wt	Mutant
212	female	sigmoid	left	IIIC	0	10-Dec-1949	69	07-May-19	yes	28-Mar-2014	yes	16-Jun-14	23-Jun-14	24-Nov-14	Folfox	6months	12	chemo completion	22	22	no	no	No		10-Aug-20	76.0	76.0	2	4	1	MSI-High										Wt	Wt	Wt	Mutant	Wt	Wt	Wt	Wt	Wt
213	male	sigmoid	left	IIC	1	15-Jan-1946	73	08-Feb-19	yes	06-Mar-2014	yes	11-Apr-14	25-Apr-14	04-Jul-14	Folfox	3months	6	chemo completion	20	20	no	no	No		13-Jul-20	76.0	76.0	2	3	2	MSI-Stable										Wt	Wt	Wt	Mutant	Wt	Wt	Wt	Wt	Wt
214	male	transverse	left	IIIB	0	23-Jan-1955	59	04-Mar-14	yes	18-Mar-2014	yes	28-Apr-14	07-May-14	01-Oct-14	Capox	6months	8	chemo completion	26	26	no	no	Yes	13-Feb-17	17-Nov-20	34.0	79.0	2	3	1
215	female	sigmoid	left	IIIB	0	20-Mar-1979	35	07-Oct-14	yes	08-Oct-2014	yes	14-Nov-14	14-Nov-14	13-Apr-15	Capox	6months	8	chemo completion	48	48	no	yes	No		29-Jul-20	69.0	69.0	2	3	1		Wt	Wt	Hetero	Hetero	Homo	Hetero	Hetero	Homo	Homo	Wt	Wt	Wt	Mutant	Wt	Wt	Wt	Wt	Mutant
216	male	sigmoid	left	IIA	0	21-Sep-1932	77	03-Jun-10	yes	18-Aug-2014	yes	18-Sep-14	24-Sep-14	25-Feb-15	Capox	6months	8	chemo completion	27	27	no	no	No		25-Nov-20	75.0	75.0	2	3	1		Wt	Hetero	Wt	Hetero	Homo	Wt	Wt	Homo	Homo	Wt	Wt	Wt	Mutant	Wt	Mutant	Wt	Wt	Mutant
217	female	ascending	right	IIIB	0	02-Feb-1940	74	19-Nov-14	yes	21-Nov-2014	yes	20-Jan-15	27-Jan-15	02-Jul-15	Folfox	6months	12	chemo completion	52	52	no	no	No		26-Feb-20	63.0	63.0	2	3	1											Wt	Wt	Wt	Mutant	Wt	Wt	Wt	Wt	Wt
218	male	sigmoid	left	IIIB	1	13-Nov-1953	65	26-Jun-19	yes	24-Oct-2014	yes	02-Dec-14	02-Dec-14	10-Feb-15	Folfox	3months	6	chemo completion	16	16	no	yes	No		08-Dec-20	73.0	73.0	2	4	2	MSI-Stable										Wt	Wt	Wt	Mutant	Wt	Wt	Wt	Wt	Wt
219	male	sigmoid	left	IIA	1	30-Jul-1938	72	24-Nov-10	yes	26-Mar-2014	yes	07-May-14	21-May-14	24-Oct-14	Capox	6months	8	chemo completion	13	13	no	no	No		01-Nov-13	6.0	6.0	2	2	1		Hetero	Homo	Hetero	Homo	Hetero	Wt	Wt	Hetero	Hetero	Wt	Wt	Wt	Mutant	Mutant	Wt	Wt	Wt	Wt
220	female	sigmoid	left	IIIB	0	21-Sep-1959	60	10-Apr-20	yes	22-Oct-2013	yes	30-Nov-13	13-Dec-13	16-May-14	Folfox	6months	12	chemo completion	28	28	no	no	No		03-Nov-20	84.0	84.0	2	3	1											Wt	Wt	Wt	Mutant	Wt	Wt	Wt	Wt	Wt
221	female	sigmoid	left	IIIC	0	18-Feb-1942	77	28-Aug-19	yes	16-Jan-2012	yes	20-Feb-12	24-Feb-12	20-Jul-12	Capox	6months	8	chemo completion	17	17	no	no	No		06-Oct-20	104.0	104.0	2	2	1											Wt	Wt	Wt	Mutant	Wt	Mutant	Wt	Wt	Wt
222	male	sigmoid	left	IIIA	0	03-Jan-1936	67	15-Oct-03	yes	12-Feb-2014	yes	14-Mar-14	28-Mar-14	06-Jun-14	Capox	3months	4	chemo completion	12	12	no	no	No		18-Nov-20	81.0	81.0	2	3	1											Wt	Wt	Wt	Mutant	Wt	Wt	Wt	Wt	Wt
223	male	sigmoid	left	IIIB	0	03-Nov-1943	69	20-Mar-13	yes	29-May-2015	yes	01-Jul-15	15-Jul-15	01-Oct-15	Capox	3months	4	chemo completion	18	18	no	no	Yes	28-Jul-16	30-Jul-19	13.0	50.0	2	3	1	MSI-Stable										Wt	Wt	Wt	Mutant	Mutant	Wt	Wt	Wt	Wt
224	male	cecum	right	IIIB	1	02-Sep-1945	71	23-Sep-16	yes	09-Jul-2014	yes	07-Aug-14	14-Aug-14	15-Oct-14	Capox	3months	4	chemo completion	12	12	no	no	Yes	10-May-18	08-May-19	46.0	57.0	2	4	2	MSI-Stable										Wt	Wt	Wt	Mutant	Wt	Wt	Wt	Wt	Wt
225	male	sigmoid	left	IIC	1	01-Apr-1946	73	17-Oct-19	yes	30-Nov-2012	yes	07-Jan-13	14-Jan-13	11-Jun-13	Capox	6months	8	chemo completion	17	17	no	no	No		25-Feb-20	86.0	86.0	2	3	1											Wt	Wt	Wt	Mutant	Wt	Wt	Wt	Wt	Wt
226	male	transverse	left	IIIB	0	09-Sep-1931	75	30-May-07	yes	08-Jul-2014	yes	11-Aug-14	18-Aug-14	26-Jan-15	Folfox	6months	12	chemo completion	12	12	no	no	No		19-Aug-19	61.0	61.0	2	3	1	MSI-Stable										Wt	Wt	Wt	Mutant	Wt	Wt	Wt	Wt	Mutant
227	male	descending	left	IIIB	0	06-Jan-1935	74	23-Nov-09	yes	09-Jan-2014	yes	06-Feb-14	27-Feb-14	31-Jul-14	Folfox	6months	12	chemo completion	23	23	no	no	No		09-Jun-16	29.0	29.0	2	3	1		Wt	Wt	Wt	Wt	Homo	Hetero	Hetero	Homo	Homo	Wt	Wt	Wt	Mutant	Wt	Wt	Wt	Wt	Wt
228	male	sigmoid	left	IIIA	0	15-Jan-1950	69	10-Oct-19	yes	29-Jul-2014	yes	06-Oct-14	13-Oct-14	12-Jan-15	Folfox	3months	6	chemo completion	13	13	no	no	No		03-Aug-20	72.0	72.0	2	4	2											Wt	Wt	Wt	Mutant	Mutant	Wt	Wt	Wt	Wt
229	male	transverse	left	IIA	1	06-Jun-1949	64	12-Jun-13	yes	24-Feb-2014	yes	07-Apr-14	14-Apr-14	18-Sep-14	Folfox	6months	12	chemo completion	51	51	no	no	No		27-Feb-15	12.0	12.0	2	3	1	MSI-Stable
230	male	ascending	right	IIIB	0	05-Apr-1942	72	23-Dec-14	yes	14-Jan-2015	yes	11-Feb-15	18-Feb-15	15-Jul-15	Capox	6months	8	chemo completion	21	21	no	no	No		16-Sep-20	68.0	68.0	2	3	1											Wt	Wt	Wt	Mutant	Mutant	Wt	Wt	Wt	Wt
231	male	sigmoid	left	IIA	1	20-Feb-1945	62	28-Mar-07	yes	09-Sep-2013	yes	07-Oct-13	14-Oct-13	23-Dec-13	Folfox	3months	6	chemo completion	15	15	no	no	No		04-Dec-20	86.0	86.0	2	3	1											Wt	Wt	Wt	Mutant	Wt	Wt	Wt	Wt	Wt
232	male	cecum	right	IIIB	0	20-Oct-1953	54	19-Dec-07	yes	21-Feb-2014	yes	20-Mar-14	02-Apr-14	13-Jun-14	Capox	3months	4	chemo completion	16	16	no	no	No		08-Apr-13	3.0	3.0	2	3	1
233	female	sigmoid	left	IIC	0	01-Jul-1941	73	05-Aug-14	yes	05-Sep-2014	yes	13-Oct-14	20-Oct-14	03-Apr-15	Folfox	6months	12	chemo completion	16	16	no	no	No		21-Mar-12	6.0	6.0	2	3	2		Wt	Hetero	Wt	Hetero	Hetero	Homo	Homo	Hetero	Hetero	Wt	Wt	Wt	Mutant	Wt	Wt	Wt	Wt	Wt
234	male	sigmoid	left	IIA	0	25-Aug-1967	52	26-Jan-20	yes	06-Oct-2014	yes	10-Nov-14	24-Nov-14	02-Feb-15	Folfox	3months	6	chemo completion	14	14	yes	no	No		01-Sep-20	70.0	70.0	2	3	1	MSI-Stable										Wt	Wt	Wt	Wt	Wt	Wt	Wt	Wt	Wt
235	female	ascending	right	IIIC	1	01-Jul-1940	69	10-Feb-10	yes	28-Nov-2014	yes	22-Dec-14	07-Jan-15	10-Jun-15	Capox	6months	8	chemo completion	19	19	no	no	No		13-Feb-17	26.0	26.0	2	3	1		Hetero	Wt	Hetero	Hetero	Homo	Homo	Homo	Hetero	Hetero	Wt	Wt	Wt	Mutant	Wt	Wt	Mutant	Wt	Wt
236	male	ascending	right	IIC	0	20-Aug-1934	76	22-Jul-11	yes	14-Aug-2014	yes	03-Oct-14	10-Oct-14	06-Mar-15	Capox	6months	8	chemo completion	49	49	no	no	No		20-Apr-17	32.0	32.0	2	3	1		Wt	Wt	Wt	Hetero	Homo	Homo	Homo	Hetero	Hetero	Wt	Wt	Wt	Mutant	Wt	Wt	Wt	Wt	Mutant
237	male	descending	left	IIIC	0	04-Jan-1953	53	02-Jun-06	yes	24-Nov-2014	yes	03-Jan-15	27-Jan-15	30-Jun-15	Folfox	6months	12	chemo completion	27	27	no	no	No		19-Dec-17	36.0	36.0	2	3	1	MSI-Stable										Wt	Wt	Wt	Mutant	Wt	Wt	Wt	Wt	Mutant
[truncated: 76 more columns]
